# Supplementary material
Source: Springer Nature journal article supplement (https://www.springermedizin.de/resource/supplementary/12885_2009_1900_MOESM2_ESM.pdf/9460054)

A

PIK3CA\_9

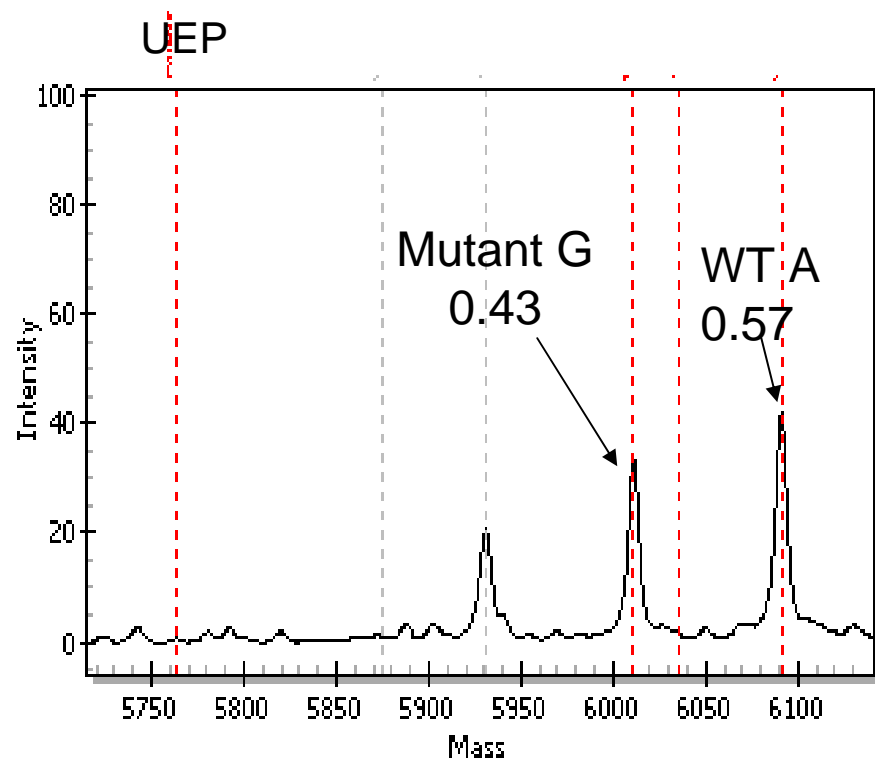

UACC-893

B

BRAF\_15

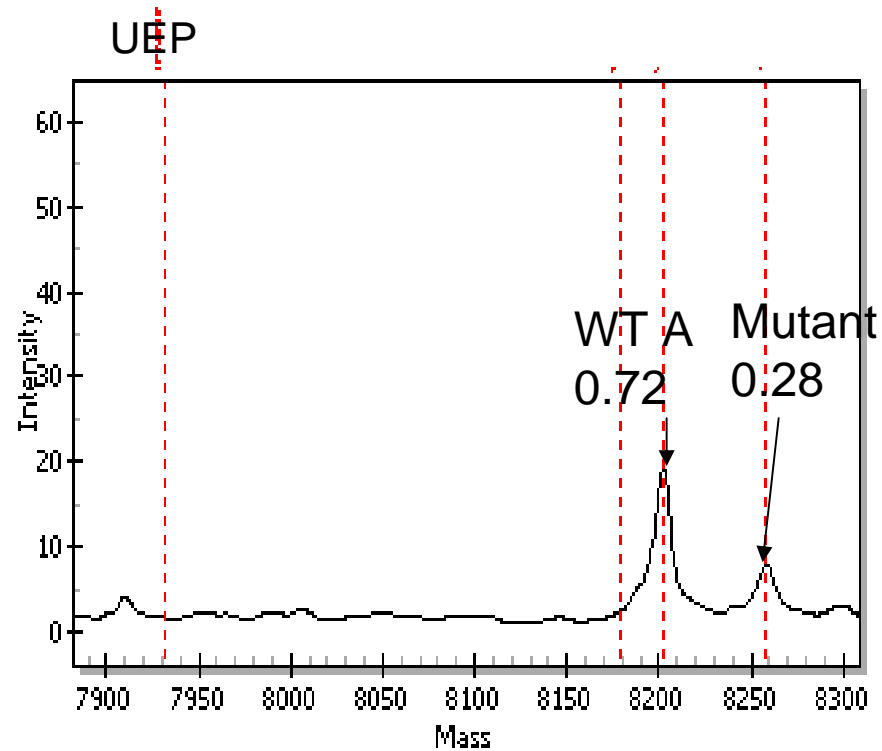

A2058

Supplement: MOESM2 [file 9460054]
